# Supplementary material for: Direct functionalization of methane into ethanol over copper modified polymeric carbon nitride via photocatalysis
Source: PubMed Central journal article supplement (PMC6355835; doi:10.1038/s41467-019-08454-0), 2019-01-31
Supplement: 41467_2019_8454_MOESM1_ESM.pdf [file 41467_2019_8454_MOESM1_ESM.pdf]

Supplementary Information

**Direct functionalization of methane into ethanol over copper modified polymeric carbon nitride via photocatalysis**

Zhou *et al.*

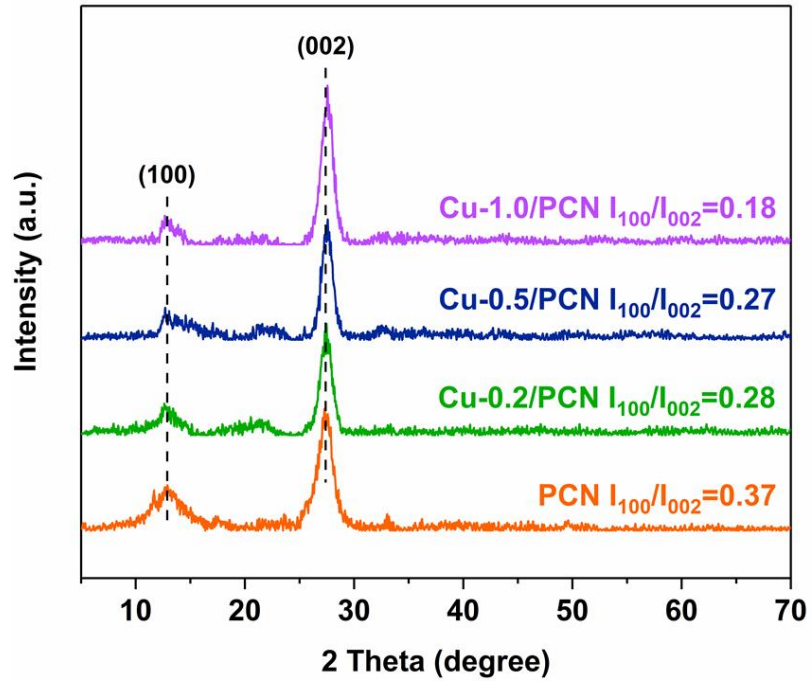

**Supplementary Figure 1.** XRD patterns of PCN and Cu-X/PCN. The interfacial stacking periodicity of PCN had been destructed with Cu introduction.

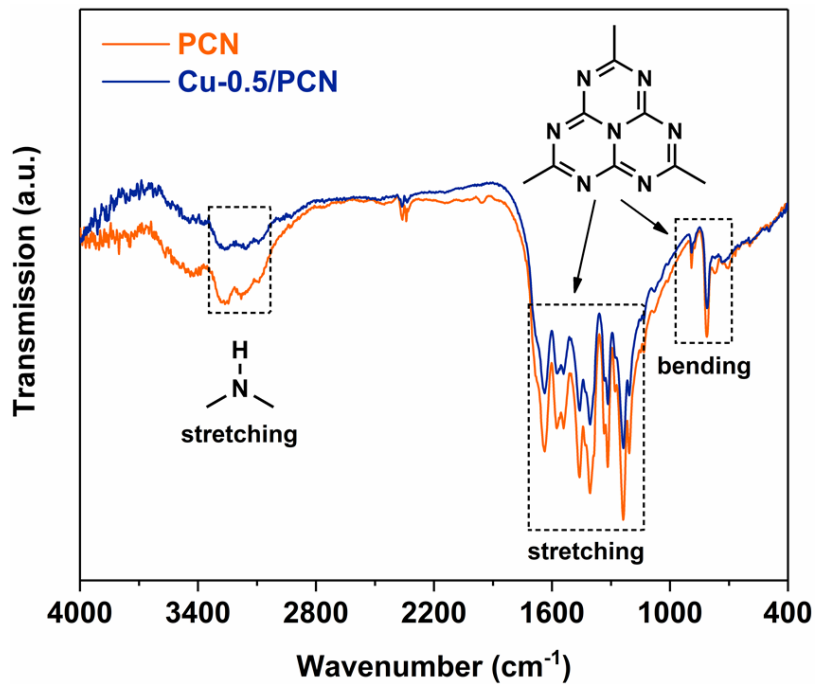

**Supplementary Figure 2.** FTIR spectra of PCN and Cu-0.5/PCN. No distinct changes of the band positions occurred after Cu introduction, confirming that modification of PCN exerted a negligible influence on its basic structure.

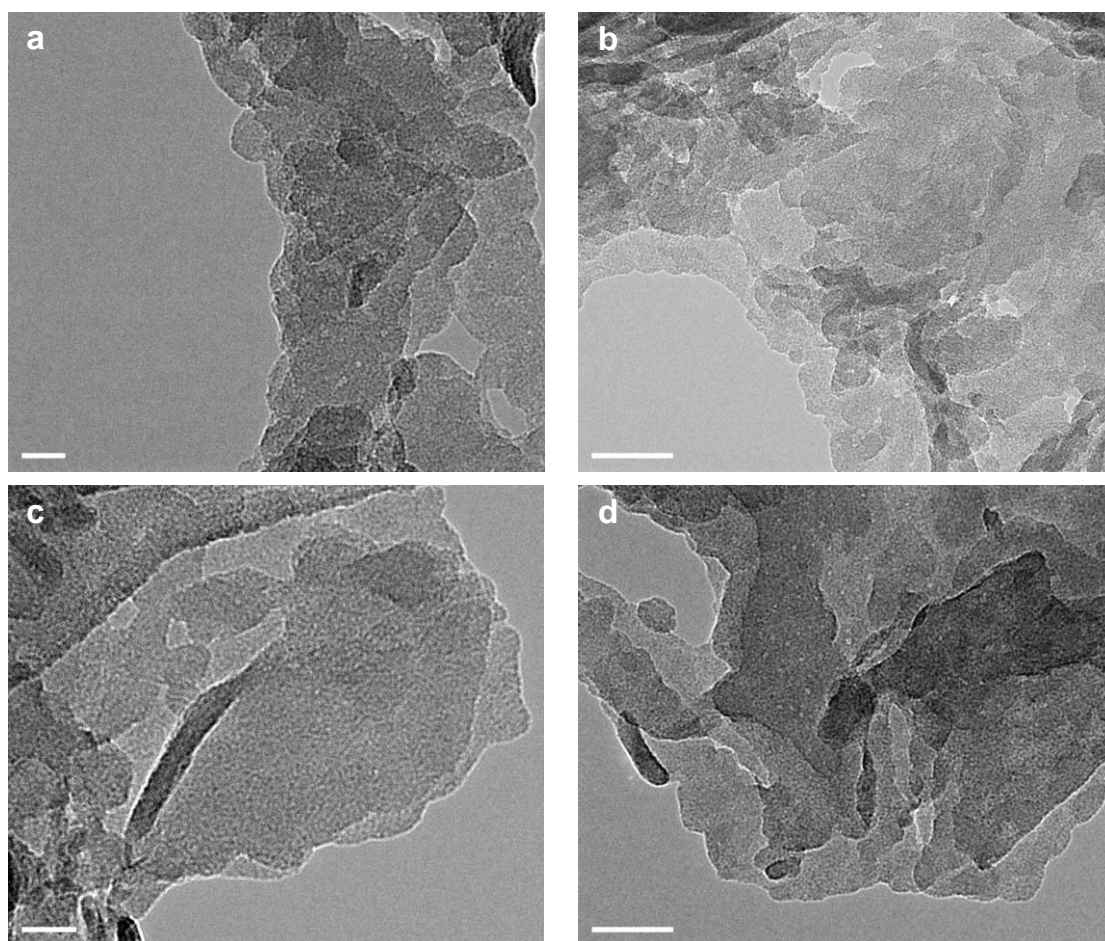

**Supplementary Figure 3. Morphology of the materials. TEM images of (a, b) PCN and (c, d) Cu-0.5/PCN. Scale bar: (a, c) 20 nm and (b, d) 50 nm. No more than the layered structure of PCN was observed with Cu incorporation.**

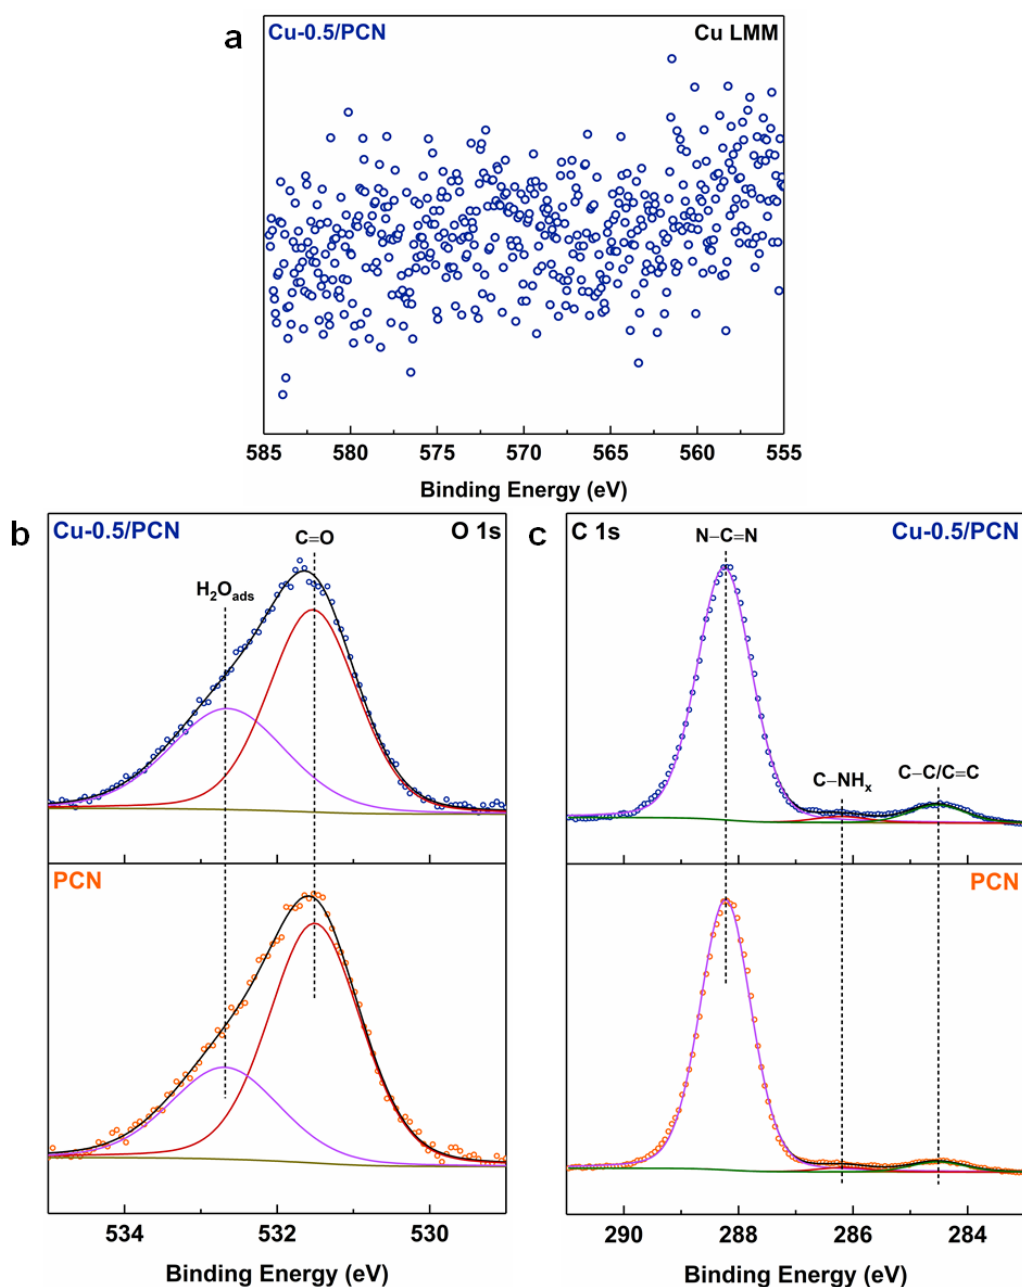

**Supplementary Figure 4. Valence state and bonding situation analysis. (a) Cu LMM XPS spectrum of Cu-0.5/PCN; (b) O 1s XPS spectra of PCN and Cu-0.5/PCN; (c) C 1s XPS spectra of PCN and Cu-0.5/PCN. No peak of Cu LMM was detected but noises, meaning that Cu<sup>0</sup> could not be told from Cu<sup>I</sup>. Neither O 1s nor C 1s XPS spectra exhibited any shift, excluding the situation of Cu oxides or Cu coordination with C atoms.**

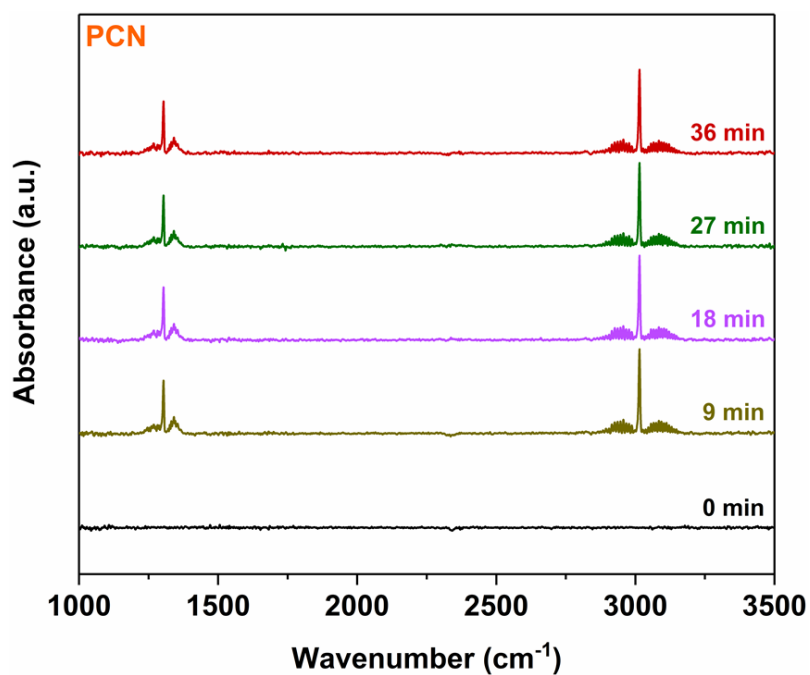

**Supplementary Figure 5. *In situ* IR spectra of methane adsorption on PCN.**

Intensities of the bands originated from methane adsorption kept unchanged, indicating weaker interaction with respect to Cu-0.5/PCN.

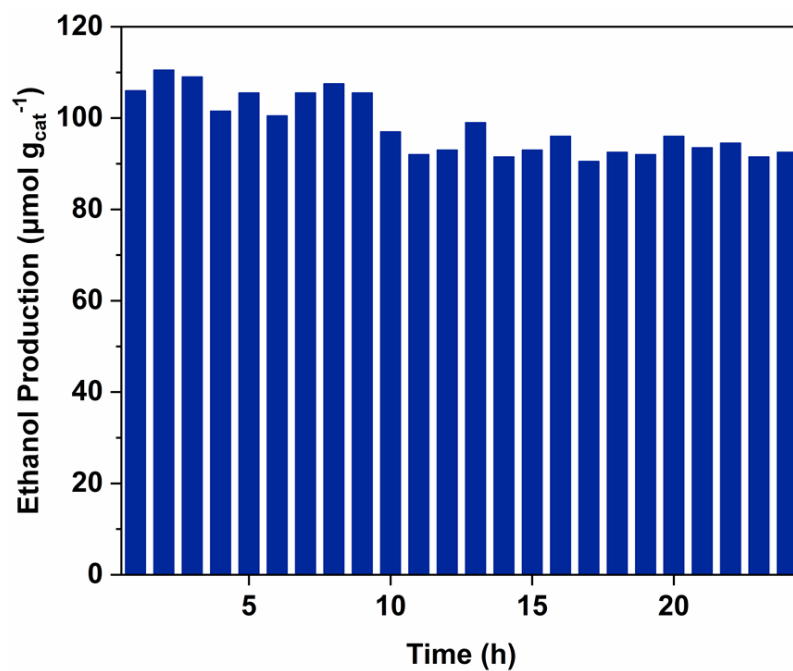

**Supplementary Figure 6. Time course of photocatalytic methane-to-ethanol conversion over Cu-0.5/PCN for 24 h.** Ethanol production decayed slightly over 24 h of testing.

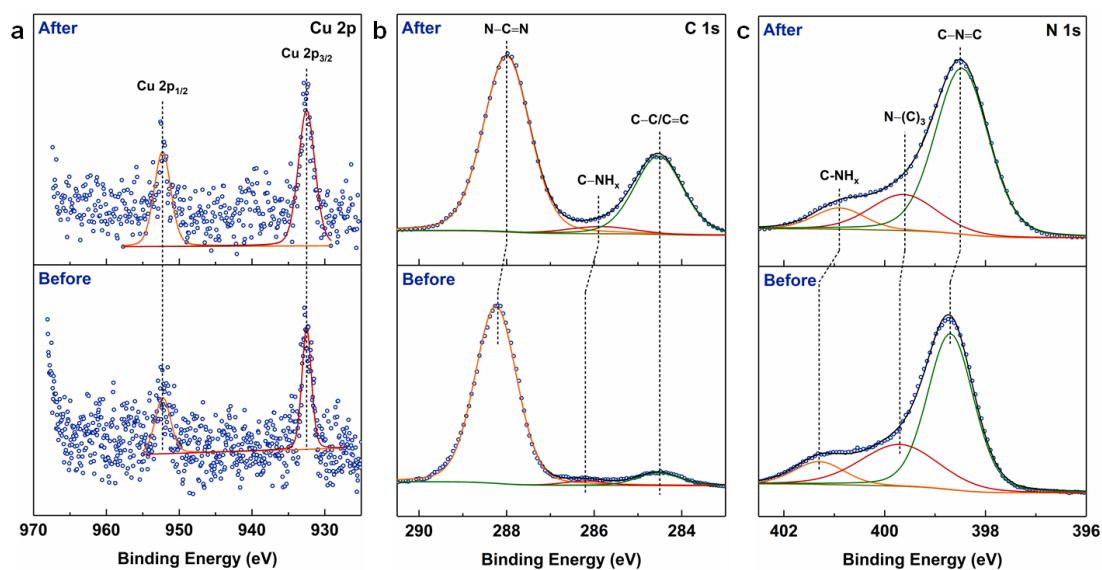

**Supplementary Figure 7. Valence state and bonding situation analysis before and after cycling tests. Cu 2p (a), C 1s (b), and N 1s (c) XPS spectra of Cu-0.5/PCN.**

From the Cu 2p XPS spectra, the mixed-valence state remained unchanged after photocatalytic tests, indicating that the oxidized Cu species from  $\text{H}_2\text{O}_2$  decomposition were reduced by the photo-induced electrons. In the C 1s XPS spectra, the peak at 284.5 eV became obvious, corresponding to coke deposition and agreeing with the ethanol production decay on Cu-0.5/PCN. The binding energy of all the peaks in the N 1s spectra was smaller in comparison to the fresh photocatalyst, which implied the increasing of the electron density of all kinds of N atoms.



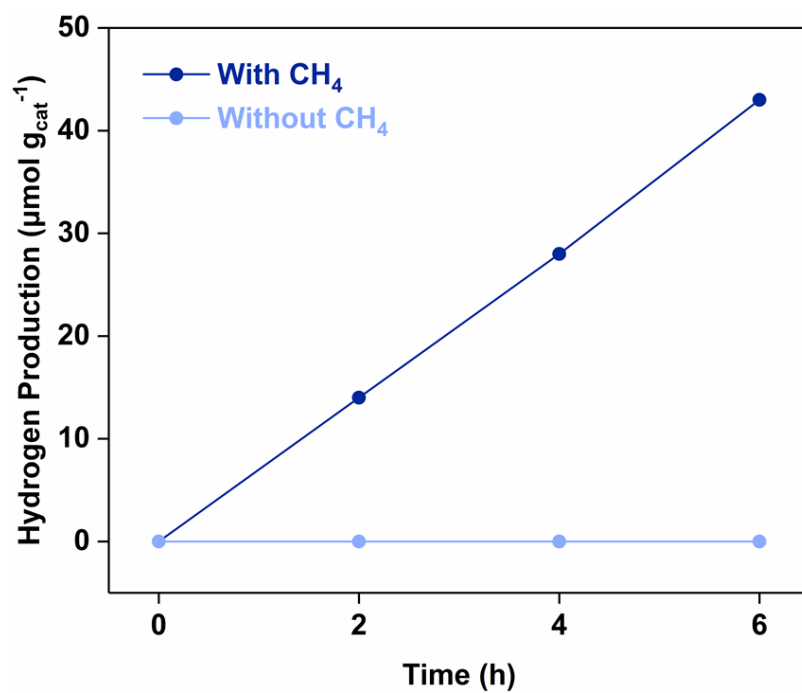

**Supplementary Figure 8. Photocatalytic hydrogen evolution over Cu-0.5/PCN with and without methane.** No H<sub>2</sub> was detected in the methane-free experiment, excluding H<sub>2</sub> evolution from photocatalytic H<sub>2</sub>O splitting.

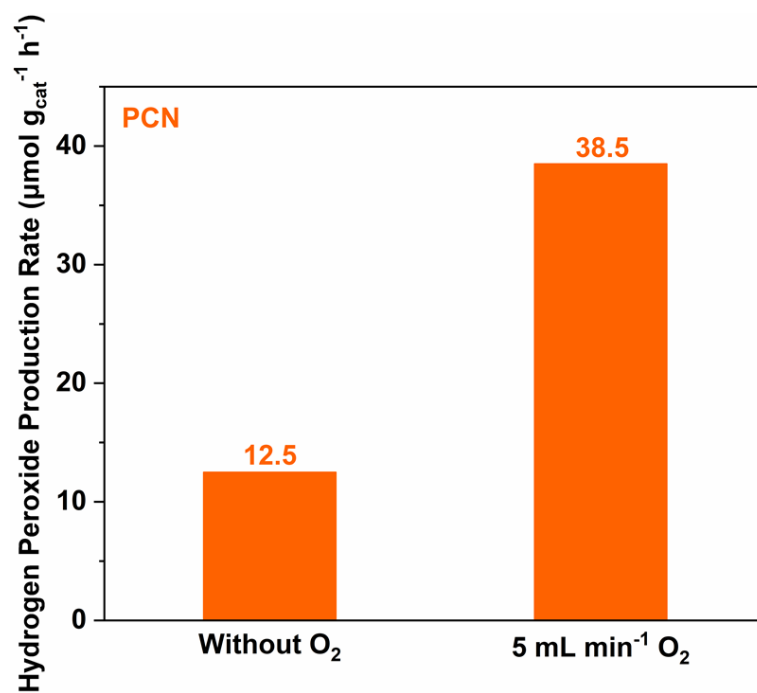

**Supplementary Figure 9. Photocatalytic hydrogen peroxide production over PCN with and without oxygen.** Introducing O<sub>2</sub> into the system facilitated H<sub>2</sub>O<sub>2</sub> production.

**Supplementary Table 1. Element content of PCN and Cu-0.5/PCN from XPS analyses.**

| <b>Atomic %</b>   | <b>C</b> | <b>N</b> | <b>O</b> | <b>Cu</b> |
|-------------------|----------|----------|----------|-----------|
| <b>PCN</b>        | 39.55    | 54.63    | 5.82     | 0         |
| <b>Cu-0.5/PCN</b> | 39.27    | 52.35    | 8.07     | 0.31      |
